# Supplementary material for: Transition metal vacancy and position engineering enables reversible anionic redox reaction for sodium storage
Source: PubMed Central journal article supplement — Nat Commun. 2025 Jan 2;16:100. doi: 10.1038/s41467-024-54998-1 (PMC11695597; doi:10.1038/s41467-024-54998-1), 2025-01-02
Supplement: 41467_2024_54998_MOESM1_ESM.pdf [file 41467_2024_54998_MOESM1_ESM.pdf]

Supplementary Information

**Transition metal vacancy and position engineering enables reversible anionic redox reaction for sodium storage**

Congcong Cai<sup>1,5</sup>, Xinyuan Li<sup>1,5</sup>, Jiantao Li<sup>2,5,\*</sup>, Ruohan Yu<sup>1,5</sup>, Ping Hu<sup>1</sup>, Ting Zhu<sup>1</sup>, Tianyi Li<sup>3</sup>, Sungsik Lee<sup>3</sup>, Nuo Xu<sup>1</sup>, Hao Fan<sup>1</sup>, Jinsong Wu<sup>1</sup>, Liang Zhou<sup>1,\*</sup>, Liqiang Mai<sup>1,\*</sup>, Khalil Amine<sup>2,4\*</sup>

<sup>1</sup>State Key Laboratory of Advanced Technology for Materials Synthesis and Processing, Wuhan University of Technology, Wuhan 430070, China

<sup>2</sup>Chemical Sciences and Engineering Division, Argonne National Laboratory, Lemont, Illinois 60439, USA

<sup>3</sup>X-ray Science Division, Advanced Photon Source, Argonne National Laboratory, Lemont, Illinois 60439, USA

<sup>4</sup>Pritzker School of Molecular Engineering, The University of Chicago, Chicago, IL 60637, USA

<sup>5</sup>These authors contributed equally to this work.

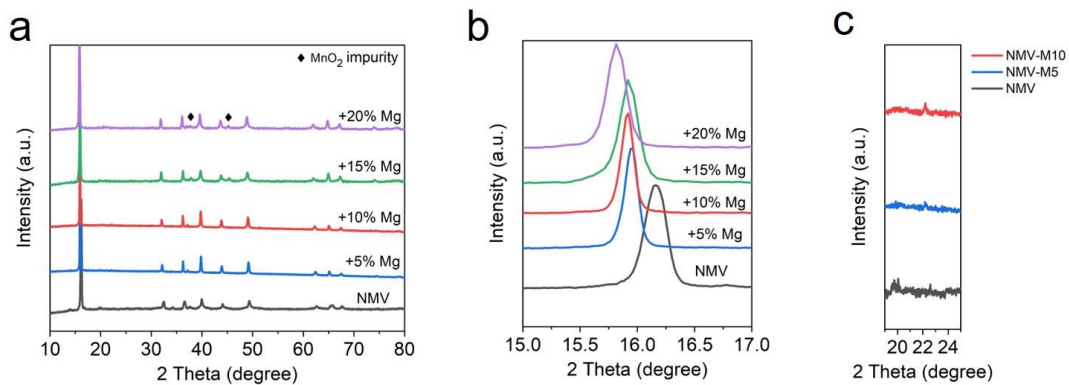

**Supplementary Figure 1.** (a) XRD patterns of the samples with different Mg contents; Enlarged XRD patterns at (a) 15–17° with increasing Mg contents and (b) 19–25° of NMV, NMV-M5, and NMV-M10.

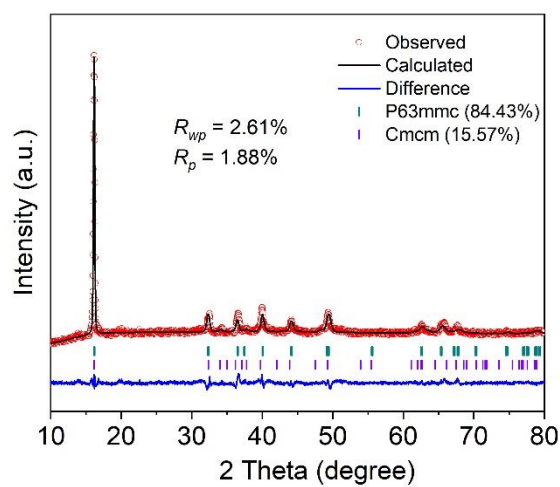

**Supplementary Figure 2.** XRD Rietveld refinement pattern of NMV.

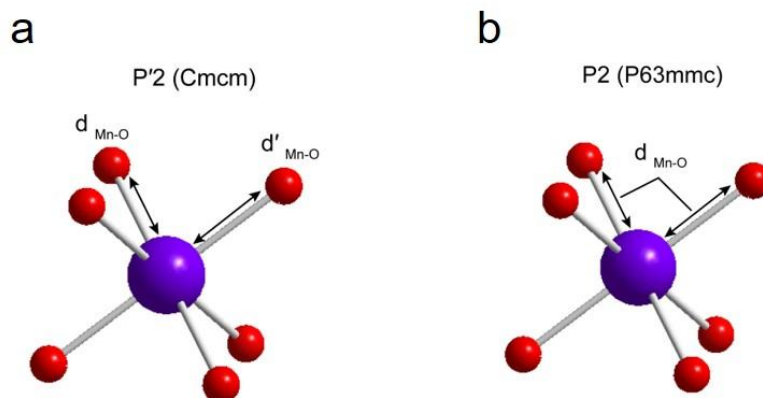

**Supplementary Figure 3.** Schematic illustration of MnO<sub>6</sub> octahedra of (a) P'2 and (b) P2 phases.

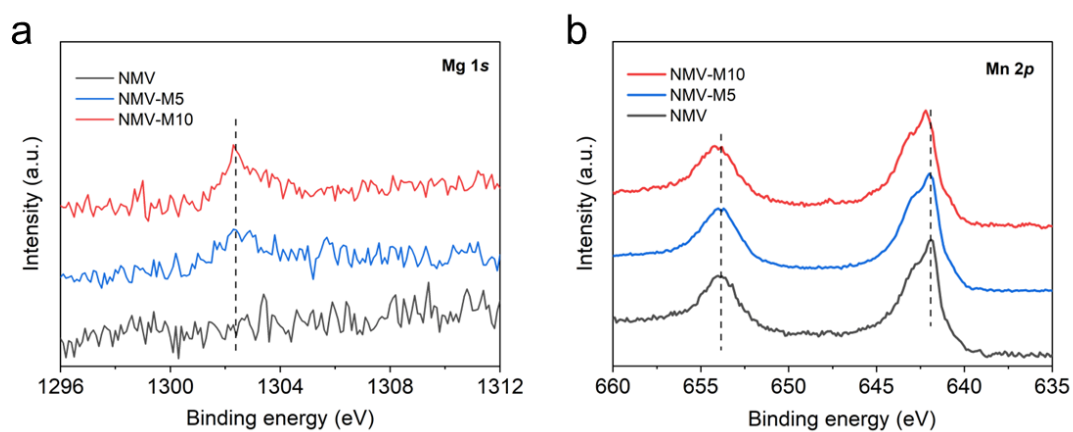

**Supplementary Figure 4.** (a) Mg 1s and (b) Mn 2p XPS spectra of NMV, NMV-M5, and NMV-M10.

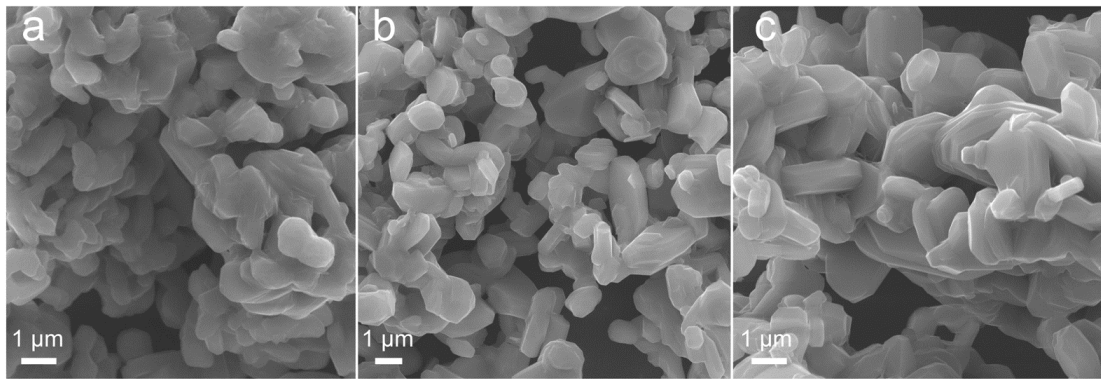

**Supplementary Figure 5.** SEM images of (a) NMV, (b) NMV-M5, and (c) NMV-M10.

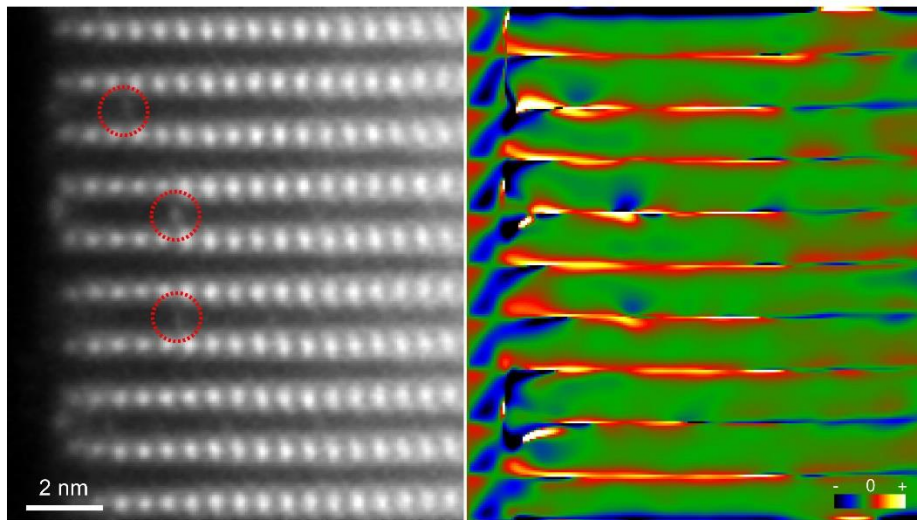

**Supplementary Figure 6.** GPA analysis based on HAADF-STEM of NMV-M10.

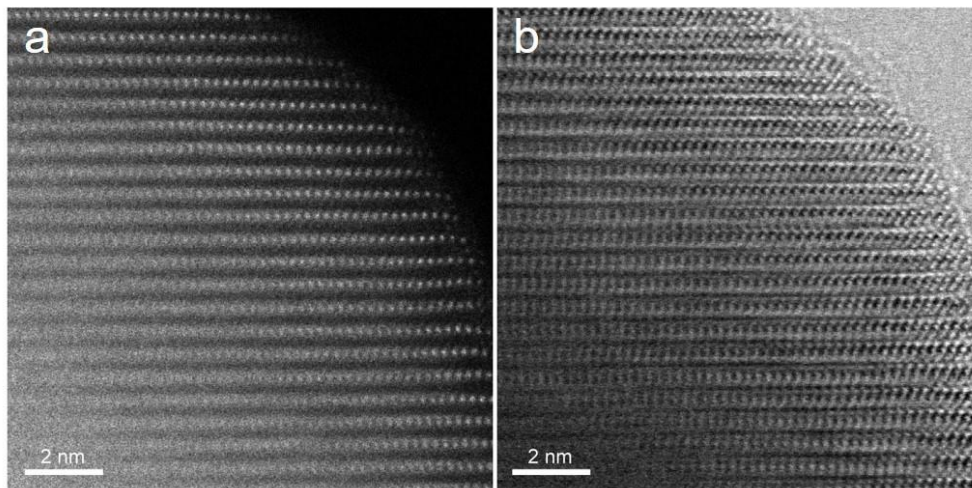

**Supplementary Figure 7.** (a) HAADF- and (b) ABF- STEM images of NMV.

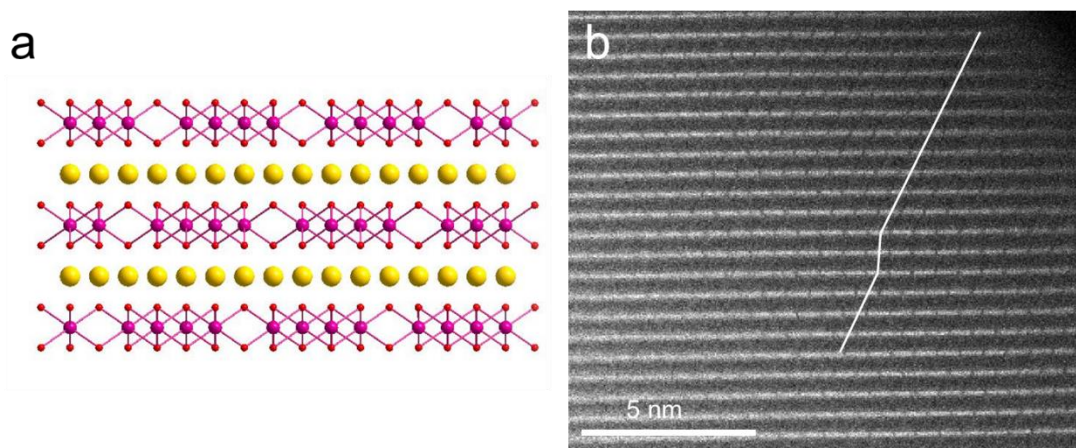

**Supplementary Figure 8.** (a) Schematic illustration of the existence of vacancies in TM layer; (b) HAADF image of NMV where ribbon-ordered TM vacancies can be observed.

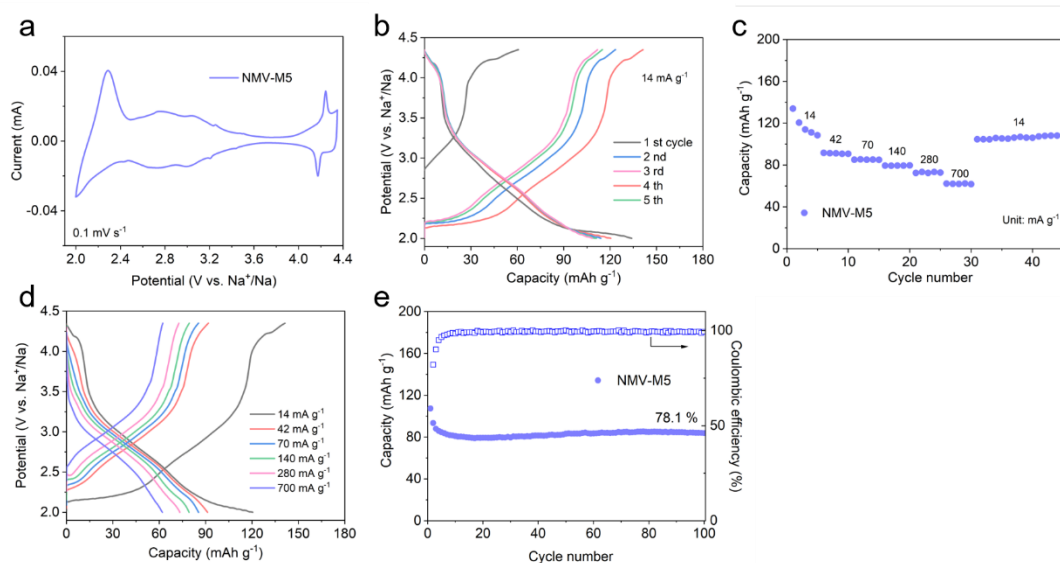

**Supplementary Figure 9. Electrochemical performances of NMV-M5.** (a) CV curve at 0.1 mV s<sup>-1</sup>; (b) first five charge/discharge profiles at 14 mA g<sup>-1</sup>; (c) rate performance; (d) GCD profiles of the second cycle at different current densities; (e) the cycling performance and Coulombic efficiencies at 42 mA g<sup>-1</sup>.

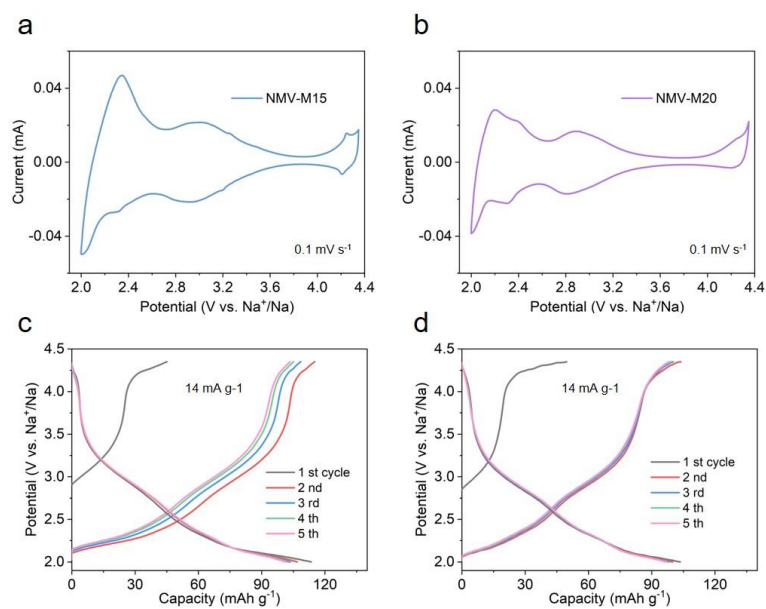

**Supplementary Figure 10. Electrochemical performances of NMV-M15 and NMV-M20.** CV curves of (a) NMV-M15 and (b) NMV-M20; the first five charge/discharge profiles of (c) NMV-M15 and (d) NMV-M20 at 14 mA g<sup>-1</sup>.

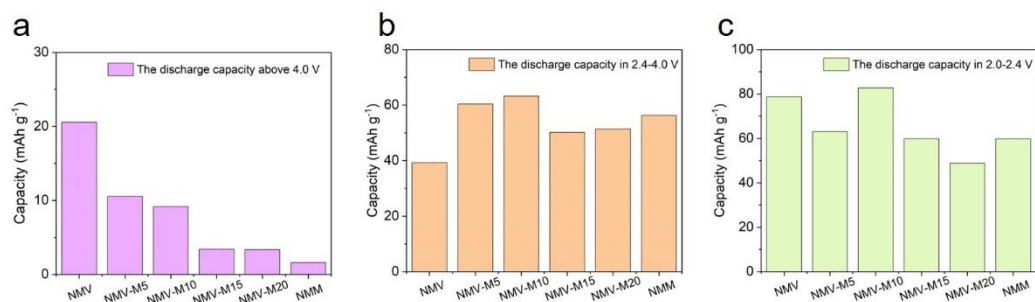

**Supplementary Figure 11.** The discharge capacity contributions of the samples from (a) above 4.0 V, (b) 2.4–4.0 V, and (c) 2.0–2.4 V at 14 mA g<sup>-1</sup>.

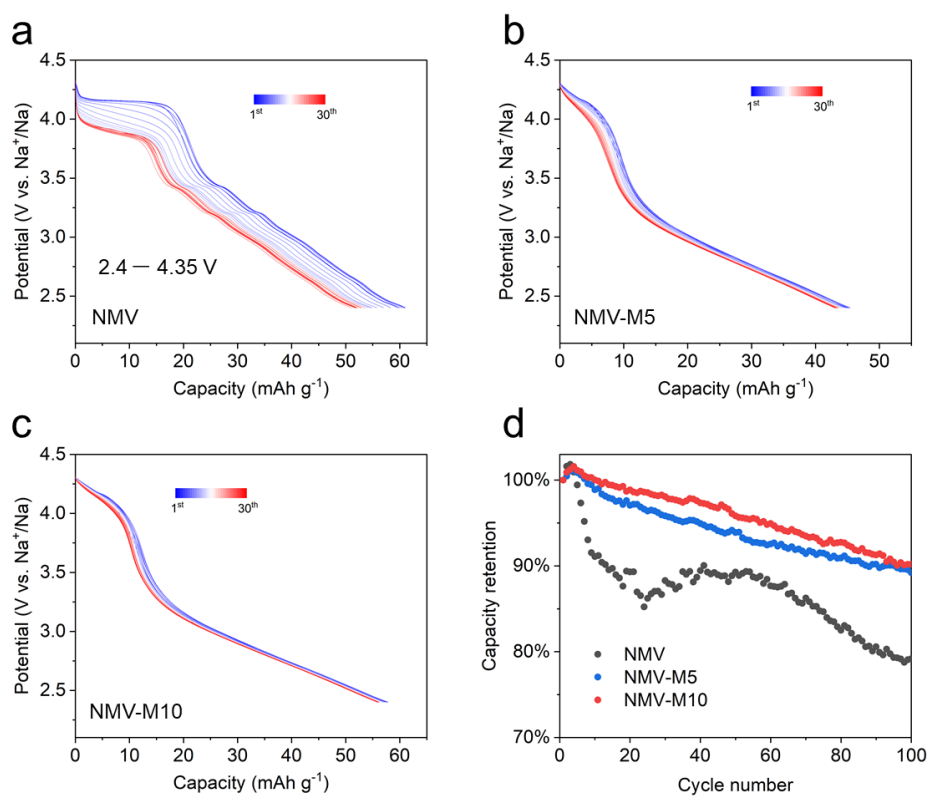

**Supplementary Figure 12.** Cycle tests in the potential range of 2.4–4.35 V to exclude the influence of cationic redox (Mn<sup>3+</sup>/Mn<sup>4+</sup>). The discharge profiles of (a) NMV, (b) NMV-M5, and (c) NMV-M10 at first 30 cycles, which were tested at 42 mA g<sup>-1</sup> within 2.40–4.35 V; (d) the cycling performances of NMV, NMV-M5, and NMV-M10 within 2.40–4.35 V.

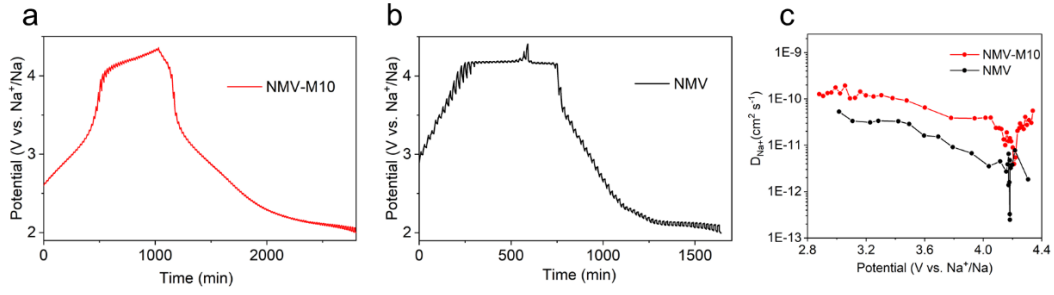

**Supplementary Figure 13.** GITT tests of (a) NMV-M10 and (b) NMV; (c) the calculated Na<sup>+</sup> diffusion coefficient ( $D_{Na^+}$ ).

The  $D_{Na^+}$  values can be calculated based on the following equation:

$$D_{Na^+} = \frac{4}{\pi\tau} \left( \frac{m_B V_M}{M_B S} \right)^2 \left( \frac{\Delta E_S}{\Delta E_\tau} \right)^2 \quad \left( \tau \ll \frac{L^2}{D_{Na^+}} \right) \quad S1$$

Where  $\tau$  is the pulse duration,  $m_B$  and  $M_B$  are the active mass and molar mass of NMV or NMV-M10,  $V_M$  is the molar volume, and  $S$  is the active surface area of the electrode.  $L$  is the average radius of the material particles.  $\Delta E_S$  and  $\Delta E_\tau$  can be obtained from the GITT curves.



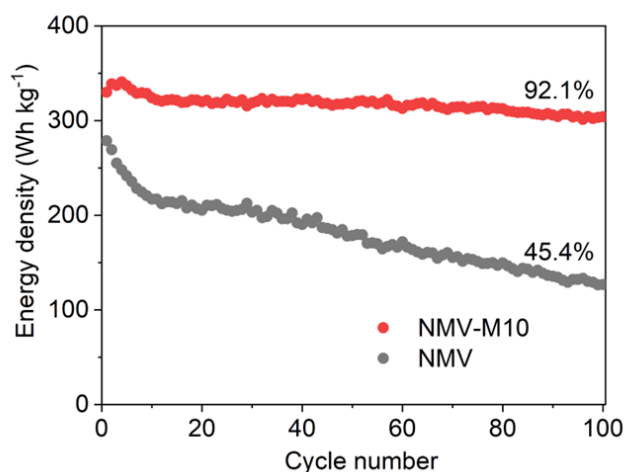

**Supplementary Figure 14. Discharge specific energy density comparison of NMV and NMV-M10 at 42 mA g<sup>-1</sup>.** The data of energy densities was exported from the NEWARE battery testing system, which was calculated according to the fomula,  $E = \sum(C_s * V_s)$ , where  $E$  denotes the gravimetric-specific energy density,  $C_s$  denotes the instantaneous specific capacity of the cathode material and  $V_s$  denotes the instantaneous voltage of the half-cell during discharging process. The total specific energy density is the accumulation of all instantaneous energy densities. The sampling frequency of the device is 10 Hz.

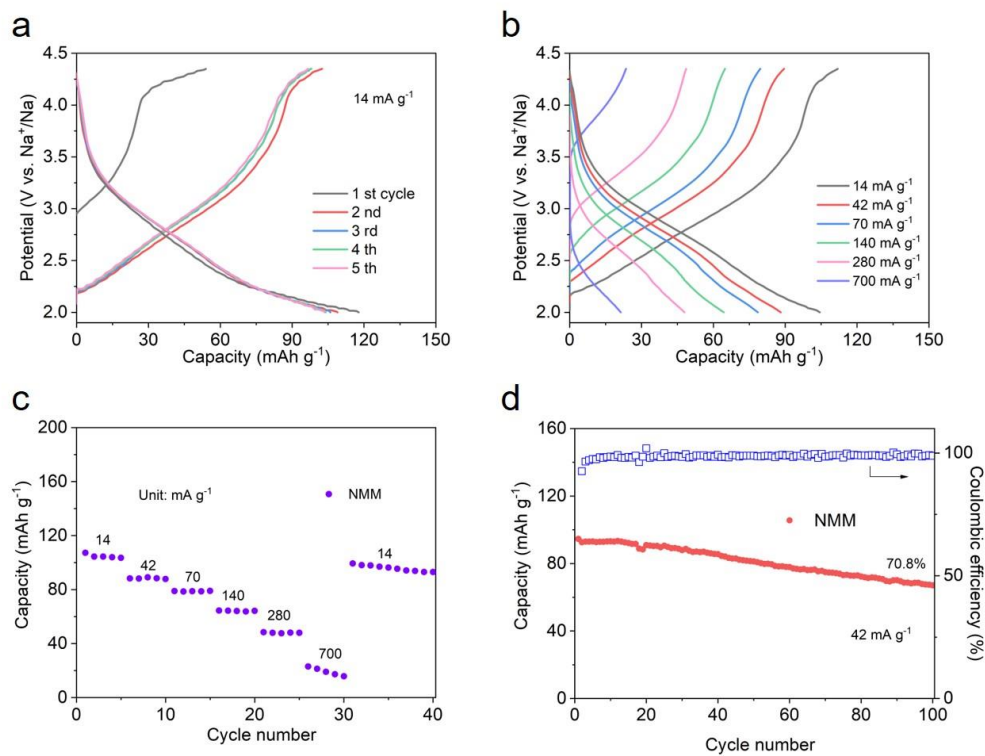

**Supplementary Figure 15. Electrochemical performances of NMM.** (a) The first five charge/discharge profiles at  $14 \text{ mA g}^{-1}$ ; (b) GCD profiles of the second cycle at different current densities; (c) rate performance; (e) the cycling performance at  $42 \text{ mA g}^{-1}$ .

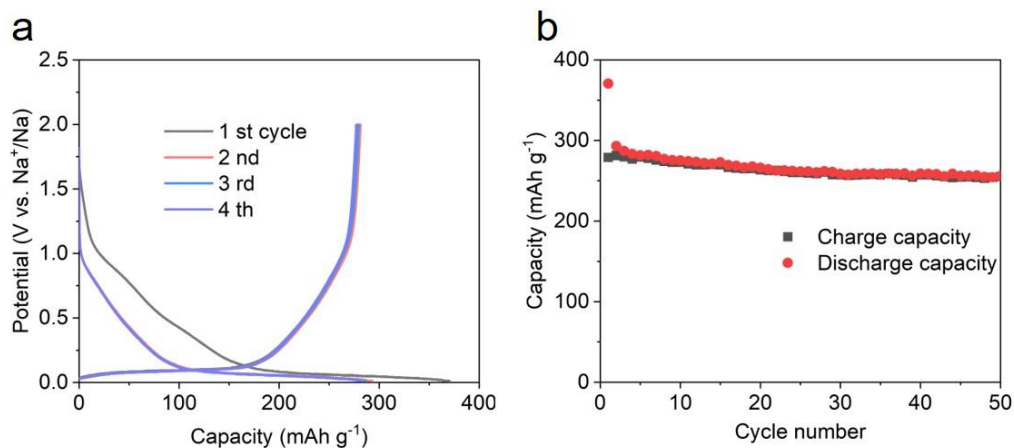

**Supplementary Figure 16. Electrochemical performances of the hard carbon.** (a) The first four discharge/charge profiles at 50 mA g<sup>-1</sup> of the commercial hard carbon; (b) the cycling stability at 50 mA g<sup>-1</sup>.

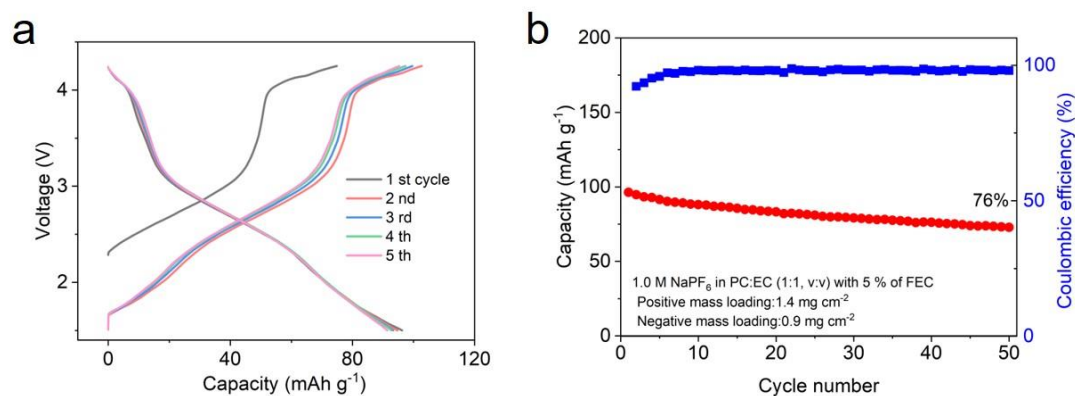

**Supplementary Figure 17. Electrochemical performances of the the HC||NMV-M10 full cell.** (a) The first five charge/discharge profiles, and (b) the cycling performance of the full cell at the current density of 50 mA g<sup>-1</sup>. The capacity and tested current is calculated based on the loading of cathode material.

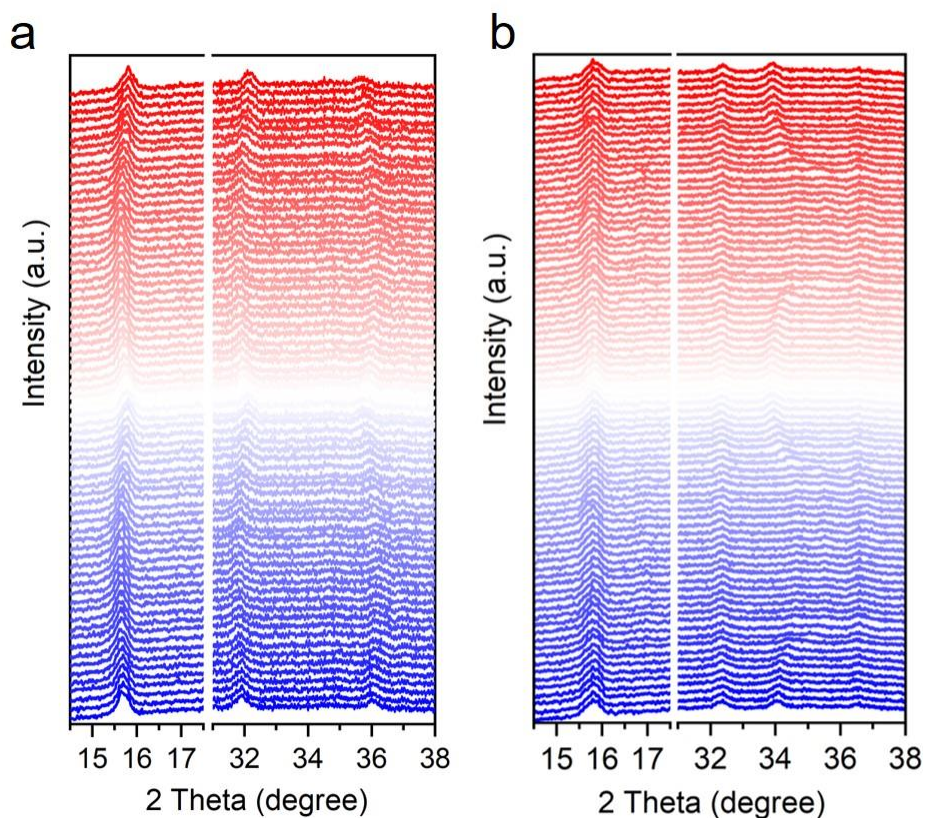

**Supplementary Figure 18.** In situ XRD patterns of (a) NMV-M10 and (b) NMV during the first two cycles.

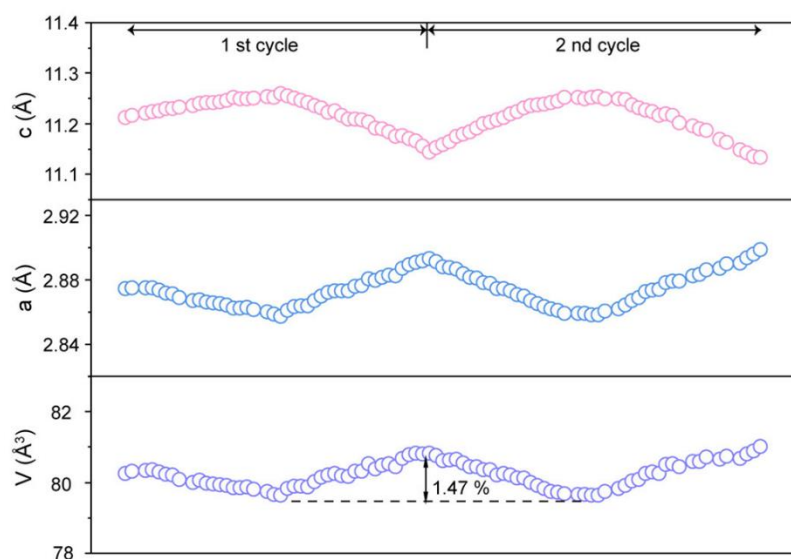

**Supplementary Figure 19.** The variation of lattice parameters for NMV-M10 during the first two charging/discharging cycles.

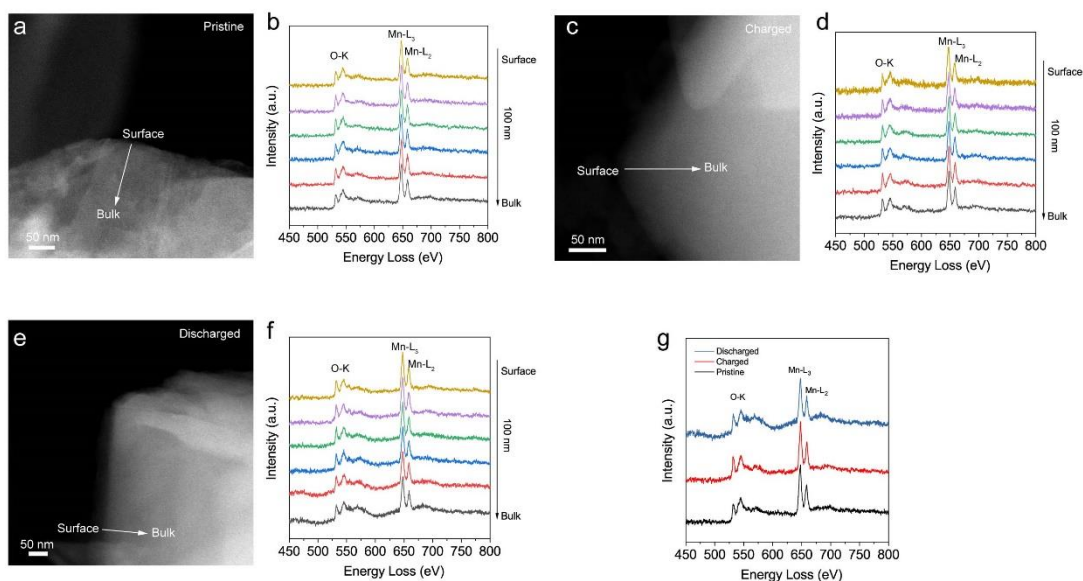

**Supplementary Figure 20. The HAADF-STEM images and corresponding ex situ EELS tests scanned from surface to bulk. (a-b) pristine, (c-d) charged to 4.35 V, and (e-f) discharged to 2.0 V. (g) comparison of the EELS results at the charged state from the bulk.**

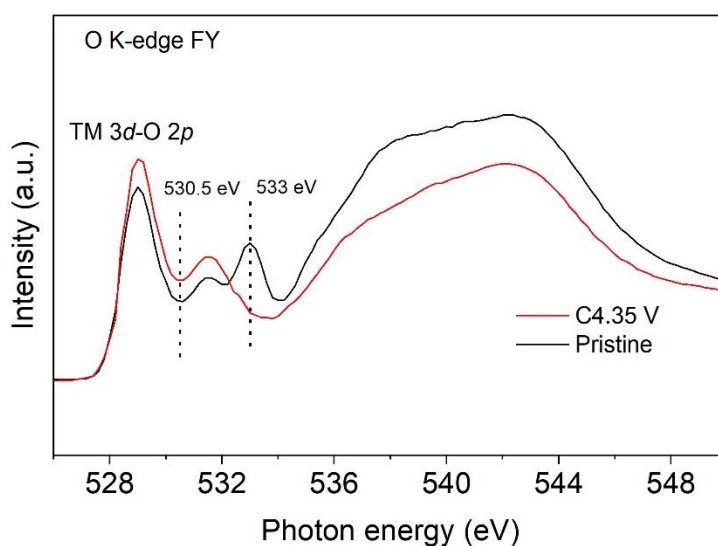

**Supplementary Figure 21. Ex situ sXAS of the O-K spectra for NMV-M10.**

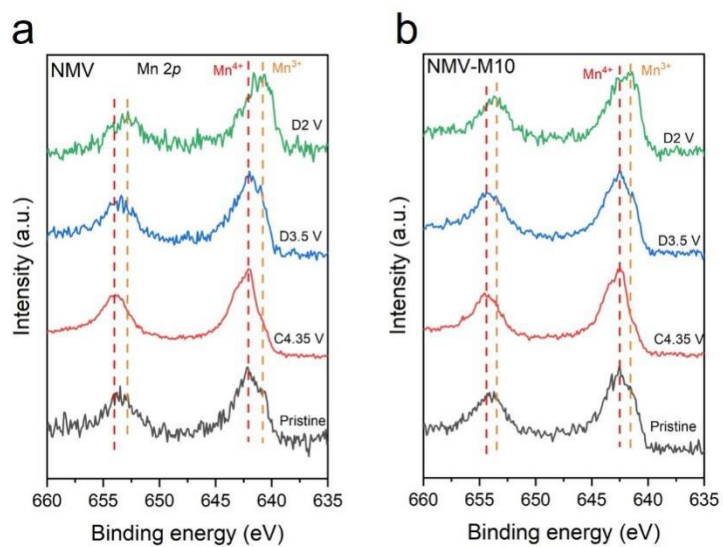

**Supplementary Figure 22.** Ex situ Mn XPS spectra of (a) NMV and (b) NMV-M10.

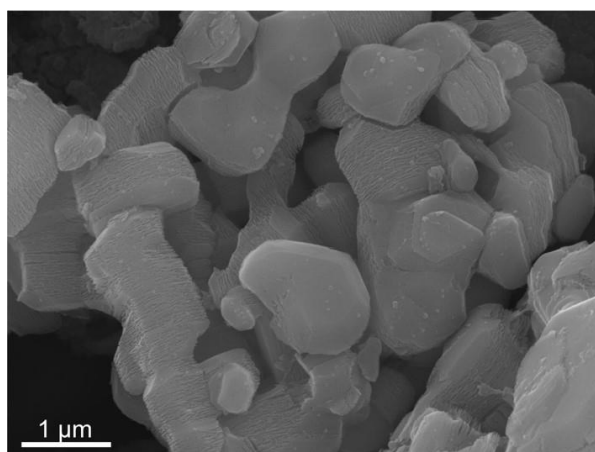

**Supplementary Figure 23.** Low magnification SEM image of NMV after 100 cycles.

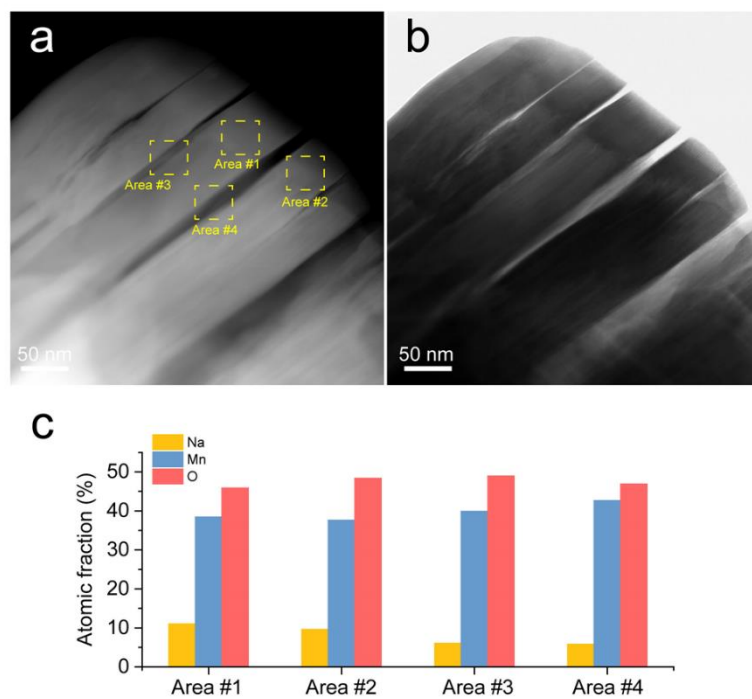

**Supplementary Figure 24.** (a) HAADF- and (b) ABF-STEM images of the NMV showing cracks; (c) the relative atomic fraction of Na, Mn, O obtained by EDS from different areas, each area was scanned for 10 mins.

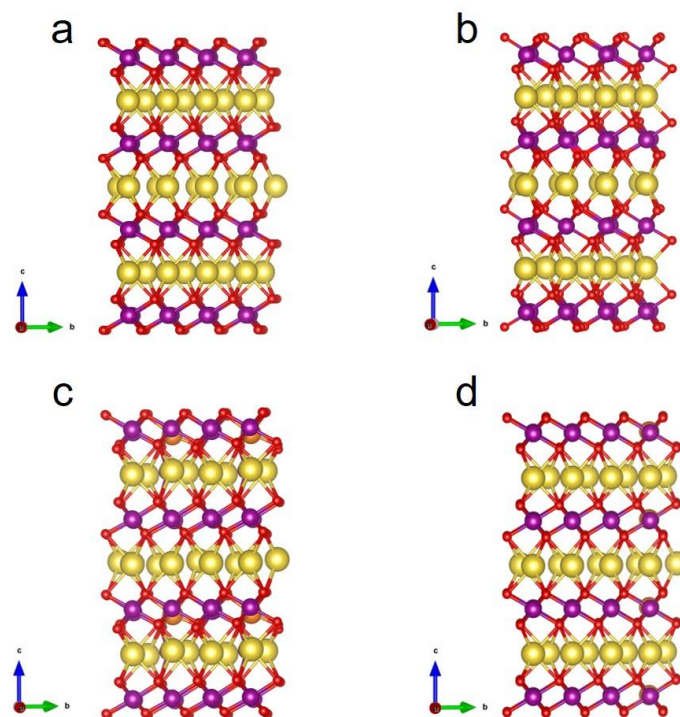

**Supplementary Figure 25.** The crystal models of (a)  $\text{Na}_8\text{Mn}_{12}\text{O}_{24}$  (NM), (b)  $\text{Na}_8\text{Mn}_{11}\text{O}_{24}$  (NMV), and (c)  $\text{Na}_8\text{Mn}_{10}\text{MgO}_{24}$  (NMV-M), (d)  $\text{Na}_8\text{Mn}_{11}\text{MgO}_{24}$  (NMM). Yellow, purple, orange and red balls represent Na, Mn, Mg, and O atoms, respectively. The information of atomic coordinates and occupancy sites are provided in the source data.

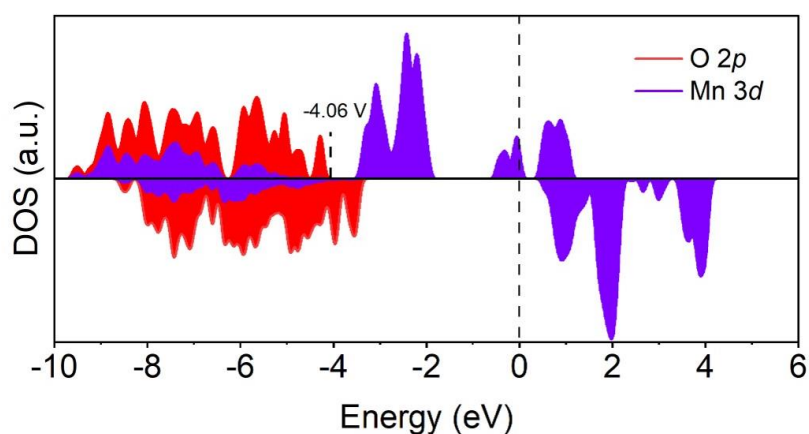

**Supplementary Figure 26.** The calculated pDOS of NMM.



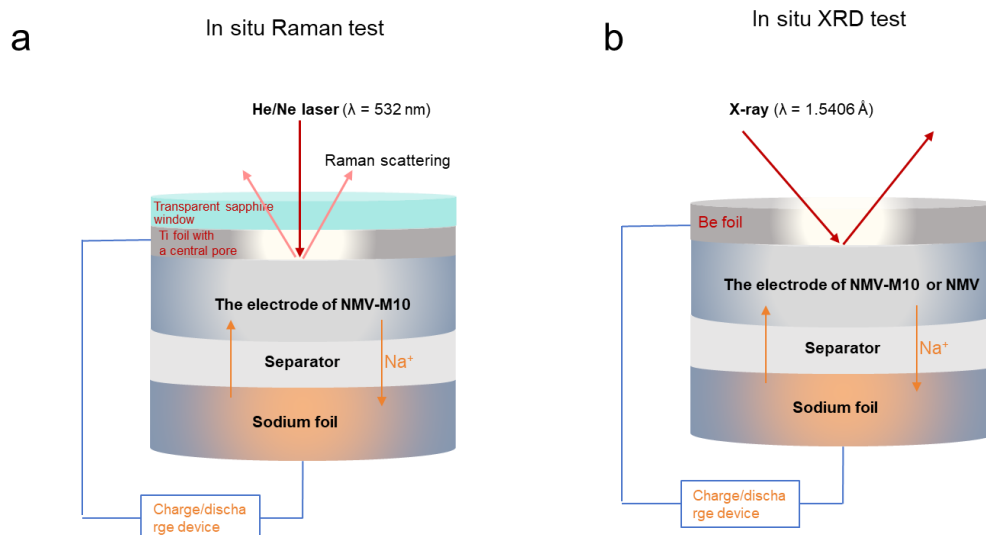

**Supplementary Figure 27.** Schematic illustration of the devices for (a) in situ Raman and (b) XRD tests.

**Supplementary Table 1.** Stoichiometry of the NCFMT and NCFMS compounds determined from ICP-OES. The samples were dissolved by aqua regia and measured with the diluted solvent.

| Samples | Na : Mg : Mn          |
|---------|-----------------------|
| NMV     | 0.685 : 0 : 0.895     |
| NMV-M5  | 0.670 : 0.044 : 0.866 |
| NMV-M10 | 0.671 : 0.097 : 0.836 |
| NMV-M15 | 0.613 : 0.151 : 0.806 |
| NMV-M20 | 0.684 : 0.197 : 0.798 |

**Supplementary Table 2.** Crystallographic parameters of NMV-M10 obtained from XRD Rietveld refinement.

| Phase | Atom                | Site | <i>x</i> | <i>y</i> | <i>z</i>  | Occ       | <i>R</i> <sub>wp</sub> | <i>R</i> <sub>p</sub> |
|-------|---------------------|------|----------|----------|-----------|-----------|------------------------|-----------------------|
| P2    | Mn1                 | 2a   | 0        | 0        | 0         | 0.8368    |                        |                       |
|       | Mg                  | 2a   | 0        | 0        | 0         | 0.0997    |                        |                       |
|       | Na <sub>f</sub> (1) | 2b   | 0        | 0        | 0.25      | 0.3406(1) | 2.12                   | 1.65                  |
|       | Na <sub>e</sub> (2) | 2d   | 0.3333   | 0.6667   | 0.75      | 0.2858(1) | %                      | %                     |
|       | O                   | 4f   | 0.3333   | 0.6667   | 0.0871(2) | 1         |                        |                       |
|       | Mn2                 | 2d   | 0.3333   | 0.6667   | 0.75      | 0.0110(5) |                        |                       |

$$a = b = 2.8704(3) \text{ \AA}, c = 11.2019(1) \text{ \AA}, V = 79.93(1) \text{ \AA}^3.$$

**Supplementary Table 3.** Crystallographic parameters of NMV obtained from XRD Rietveld refinement.

| Phase | Atom                | Site | <i>x</i> | <i>y</i>  | <i>z</i>  | Occ      | <i>R</i> <sub>wp</sub> | <i>R</i> <sub>p</sub> |
|-------|---------------------|------|----------|-----------|-----------|----------|------------------------|-----------------------|
| P'2   | Mn                  | 4a   | 0        | 0         | 0         | 0.90     |                        |                       |
|       | Na <sub>f</sub> (1) | 4c   | 0        | 0.063(4)  | 0.25      | 0.08(6)  |                        |                       |
|       | Na <sub>e</sub> (2) | 4c   | 0        | 0.688(4)  | 0.25      | 0.59(6)  |                        |                       |
|       | O                   | 8f   | 0        | 0.6523(9) | 0.9101(1) | 1        | 2.61                   | 1.88                  |
| P2    | Mn                  | 2a   | 0        | 0         | 0         | 0.90     | %                      | %                     |
|       | Na <sub>f</sub> (1) | 2b   | 0        | 0         | 0.25      | 0.323(7) |                        |                       |
|       | Na <sub>e</sub> (2) | 2d   | 0.3333   | 0.6667    | 0.75      | 0.347(7) |                        |                       |
|       | O                   | 4f   | 0.3333   | 0.6667    | 0.0815(5) | 1        |                        |                       |

$$\text{P'2 (15.47\%): } a = 2.935(3) \text{ \AA}, b = 5.302(5) \text{ \AA}, c = 11.211(3) \text{ \AA}, V = 174.5(3) \text{ \AA}^3$$

$$\text{P2 (84.13\%): } a = b = 2.8674(4) \text{ \AA}, c = 11.149(3) \text{ \AA}, V = 69.4(4) \text{ \AA}^3$$

**Supplementary Table 4.** The synthesis conditions for different samples. (Unit: mmol)

| <b>Samples</b>                                          | <b>NMV</b> | <b>NMV-M5</b> | <b>NMV-<br/>M10</b> | <b>NMV-<br/>M15</b> | <b>NMV-<br/>M20</b> |
|---------------------------------------------------------|------------|---------------|---------------------|---------------------|---------------------|
| Oxalic acid                                             | 44         | 44            | 44                  | 44                  | 44                  |
| NaNO <sub>3</sub>                                       | 7.04       | 7.04          | 7.04                | 7.04                | 7.04                |
| Mg(NO <sub>3</sub> ) <sub>2</sub> ·6H <sub>2</sub> O    | 0          | 0.5           | 1                   | 1.5                 | 2                   |
| Mn(CH <sub>3</sub> COO) <sub>2</sub> ·4H <sub>2</sub> O | 10         | 9.5           | 9                   | 8.5                 | 8                   |

**Supplementary Table 5.** Electrochemical performance comparison of NMV-M10 and other layered oxide cathodes with anionic redox reaction.

| Layered oxide cathode                                                                             | Anion redox reaction triggered | Voltage range (V) | Measurement condition                                          | References |
|---------------------------------------------------------------------------------------------------|--------------------------------|-------------------|----------------------------------------------------------------|------------|
| $\text{Na}_2\text{Mn}_3\text{O}_7$<br>( $\text{Na}_{4/7}\text{Mn}_{6/7}\square_{1/7}\text{O}_2$ ) | Vacancy                        | 3-4.65            | 50 cycles at 0.1C<br>76.4%                                     | [1]        |
| $\text{Na}_{0.653}\text{Mn}_{0.929}\square_{0.071}\text{O}_2$                                     | Vacancy                        | 1.5-4.3           | 60 cycles at 0.1 C<br>86.7%                                    | [2]        |
| $\text{Na}_{2/3}\text{Mg}_{1/3}\text{Mn}_{2/3}\text{O}_2$                                         | Mg                             | 2-4.5             | 100 cycles at 1 C<br>80%                                       | [3]        |
| $\text{Na}_{2/3}\text{Mn}_{0.72}\text{Cu}_{0.22}\text{Mg}_{0.06}\text{O}_2$                       | Mg                             | 2-4.5             | 100 cycles at 1 C<br>87.9%                                     | [4]        |
| $\text{Na}_{2/3}[\text{Mn}_{7/9}\text{Zn}_{2/9}]\text{O}_2$                                       | Zn                             | 1.5-4.5           | 50 cycles at 0.1 C<br>60%                                      | [5]        |
| $\text{NaLi}_{1/9}\text{Ni}_{2/9}\text{Fe}_{2/9}\text{Mn}_{4/9}\text{O}_2$                        | Li                             | 2-4.3             | 200 cycles at 1 C<br>82.8%                                     | [6]        |
| <b>This work</b>                                                                                  | <b>Mg, vacancy</b>             | <b>2-4.35</b>     | <b>200 cycles at 1 C<br/>(140 mA g<sup>-1</sup>)<br/>87.5%</b> |            |

## Supplementary References

1. Song, B. *et al.* Understanding the Low-Voltage Hysteresis of Anionic Redox in  $\text{Na}_2\text{Mn}_3\text{O}_7$ . *Chem. Mater.* **31**, 3756-3765 (2019).
2. Zhao, C., Wang, Q., Lu, Y., Jiang, L., Liu, L., Yu, X., Chen, L., Li, B., Hu, Y.-S. Decreasing Transition Metal Triggered Oxygen Redox Activity in Na-Deficient Oxides. *Energy Storage Mater.* **20**, 395-400 (2019).
3. Dai, K. *et al.* High Reversibility of Lattice Oxygen Redox Quantified by Direct Bulk Probes of Both Anionic and Cationic Redox Reactions. *Joule* **3**, 518-541 (2019).
4. Wang, P.-F. *et al.* Both Cationic and Anionic Redox Chemistry in a P2-Type Sodium Layered Oxide *Nano Energy*, **69**, 104474 (2020).
5. Bai, X. *et al.* Anionic Redox Activity in a Newly Zn-Doped Sodium Layered Oxide  $\text{P2-Na}_{2/3}\text{Mn}_{1-y}\text{Zn}_y\text{O}_2$  ( $0 < y < 0.23$ ). *Adv. Energy Mater.* **8** (32), 1802379 (2018).
6. Guo, Y. *et al.* Boron-Doped Sodium Layered Oxide for Reversible Oxygen Redox Reaction in Na-ion Battery Cathodes. *Nat. Commun.* **12**, 5267 (2021)
